# Supplementary material for: Synthesis and decomposition of Li3Na(NH2)4 and investigations of Li–Na–N–H based systems for hydrogen storage
Source: Royal Society of Chemistry journal article supplement (doi:10.1039/c5cp06719g), 2015-12-01
Supplement: c5cp06719g1.pdf [file c5cp06719g1.pdf]

## Supporting Information

### Synthesis and decomposition of $\text{Li}_3\text{Na}(\text{NH}_2)_4$ and investigations of Li–Na–N–H based systems for hydrogen storage

Lars H. Jepsen<sup>a</sup>, Peikun Wang<sup>b</sup>, Guotao Wu<sup>b</sup>, Zhitao Xiong<sup>b</sup>, Flemming Besenbacher<sup>c</sup>, Ping Chen<sup>b\*</sup>

and Torben R. Jensen<sup>a\*</sup>

<sup>a</sup>*Center for Materials Crystallography, Interdisciplinary Nanoscience Center and Department of Chemistry, Aarhus University, Langelandsgade 140, DK-8000 Aarhus C, Denmark*

<sup>b</sup>*Dalian Institute of Chemical Physics, Chinese Academy of Sciences, 116023, P.R. China*

<sup>c</sup>*Interdisciplinary Nanoscience Center (iNANO) and Department of Physics and Astronomy, Aarhus University, Ny Munkegade 120, DK-8000 Aarhus C, Denmark.*

\*Corresponding authors

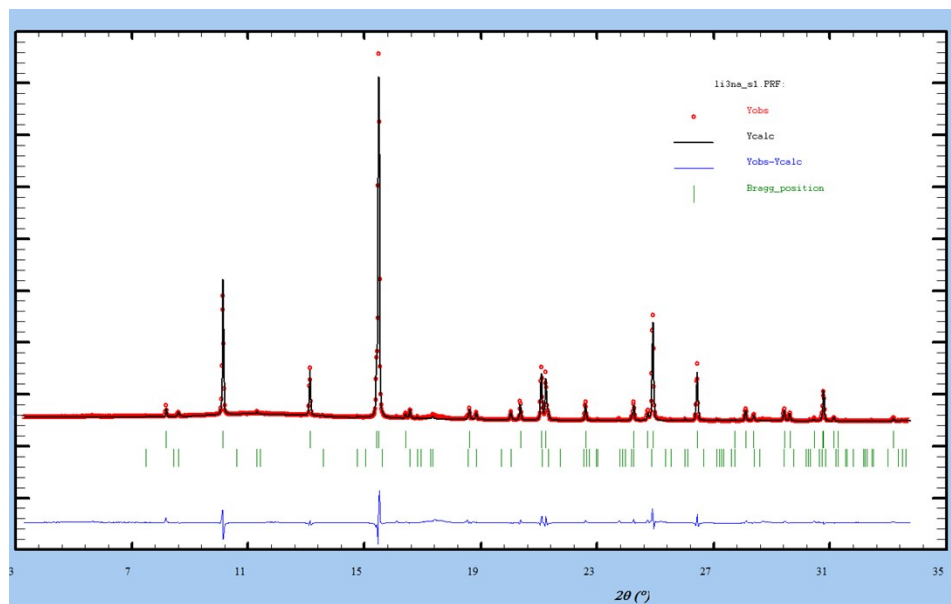

**Figure S1** SR-PXD data collected at RT for  $\text{LiNH}_2\text{-NaNH}_2$  (3:1) ball milled for 90 min and annealed at 150 °C for 6h (s4),  $\lambda = 0.82306 \text{ \AA}$ .

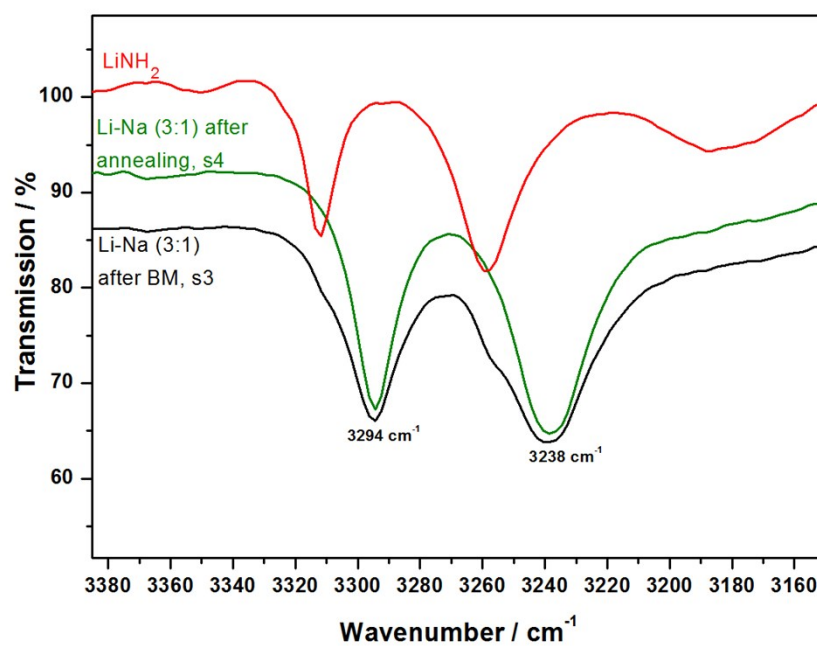

**Figure S2** FTIR spectra recorded for  $\text{LiNH}_2\text{-NaNH}_2$  (3:1) after 90 min ball milling (black, s3) and after annealing at 150 °C (green, s4) compared with  $\text{LiNH}_2$  (red).

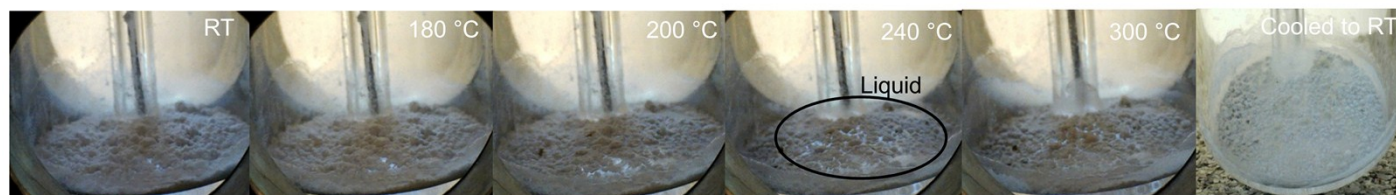

**Figure S3** Temperature programmed photographic analysis of  $\text{Li}_3\text{Na}(\text{NH}_2)_4$  (s4) during heating to 300 °C (4 °C/min) under argon atmosphere. A liquid is observed on the bottom of the glass vial at 240 °C. At 300 °C, the sample has a yellowish color which may suggest the presence of  $\text{Li}_2\text{NH}$ .

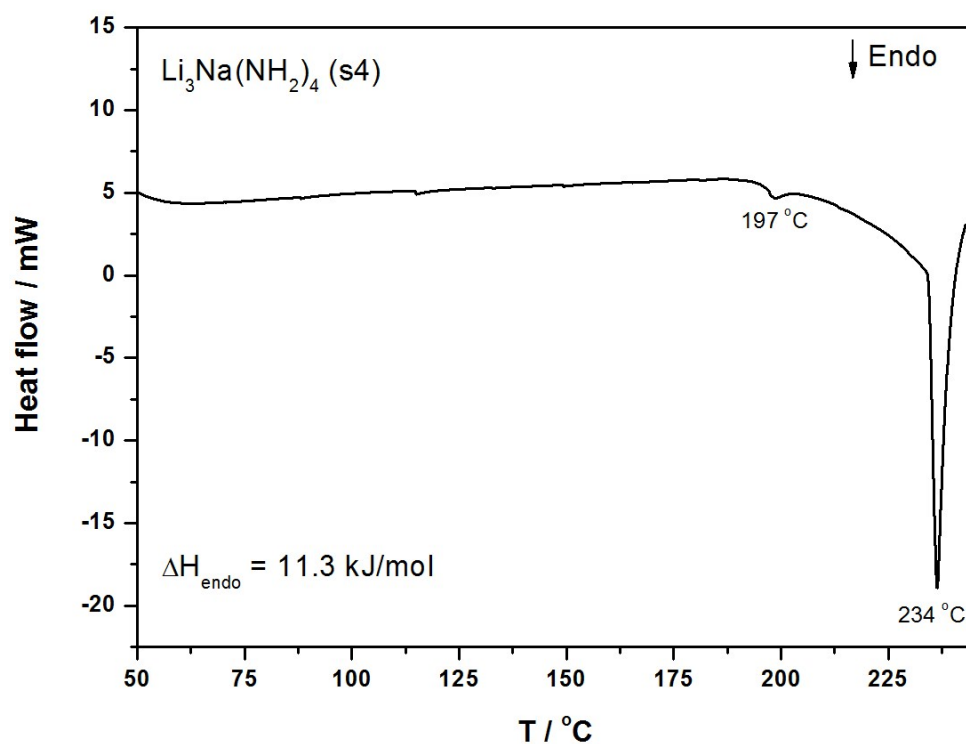

**Figure S4** Calorimetric measurement of  $\text{Li}_3\text{Na}(\text{NH}_2)_4$  (s4) heated to 245 °C (0.5 °C/min).

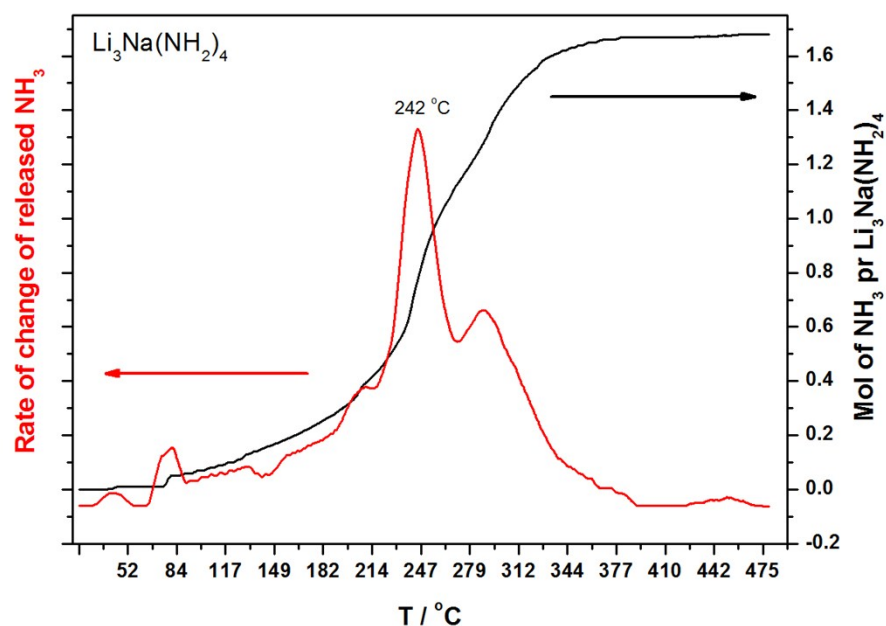

**Figure S5** Determination of released  $\text{NH}_3$  for  $\text{Li}_3\text{Na}(\text{NH}_2)_4$  (s4) during heating from RT to 475 °C (2 °C/min). The black line shows the accumulated  $\text{NH}_3$  released, while the red line (differentiated) reveals the rate of change in released  $\text{NH}_3$ .

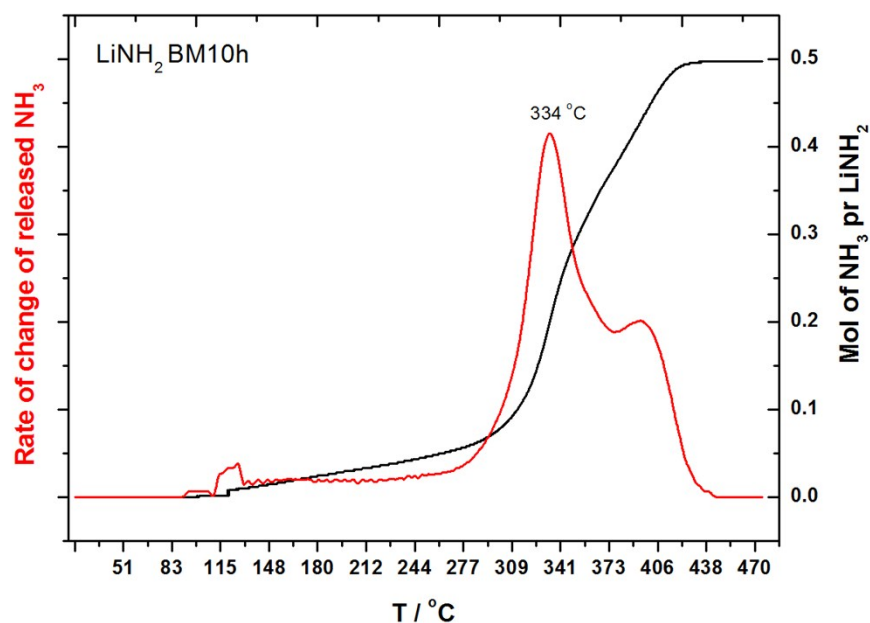

**Figure S6** Determination of released  $\text{NH}_3$  for  $\text{LiNH}_2$  BM 10h (s12) during heating from RT to 475 °C (2 °C/min). The black line shows the accumulated  $\text{NH}_3$  released during heating, while the red line (differentiated of black line) shows the rate of change of the  $\text{NH}_3$  release.

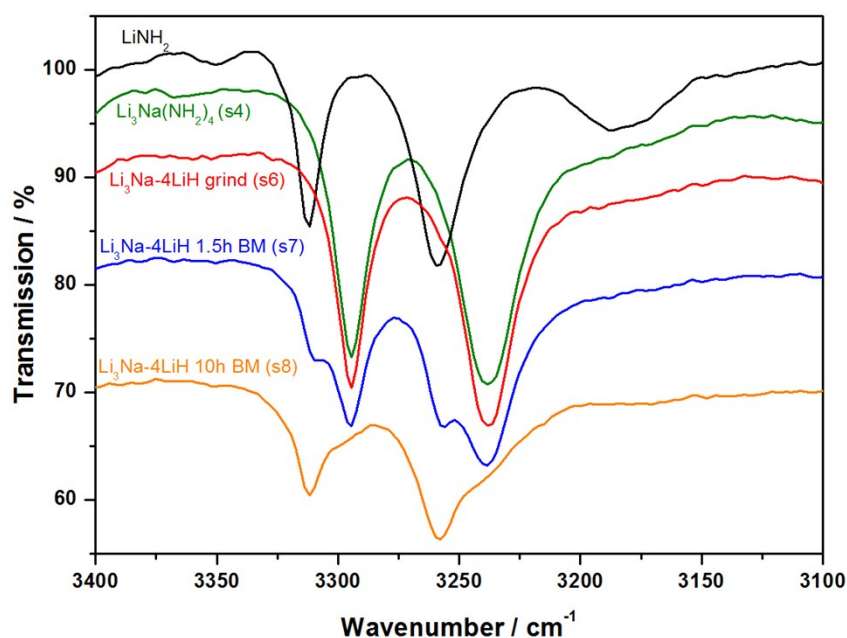

**Figure S7** FTIR measured for  $\text{Li}_3\text{Na}(\text{NH}_2)_4\text{-LiH}$  (1:4) mixed in a mortar for 5 min (s6, red), ball milled for 1.5 h (s7, blue) and ball milled for 10 h (s8, orange).

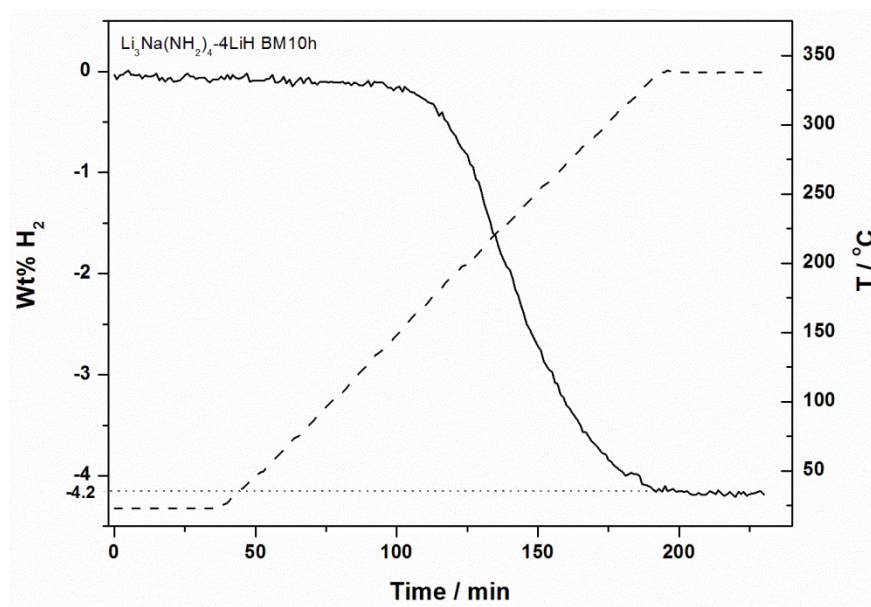

**Figure S8** Sievert's measurement of  $\text{Li}_3\text{Na}(\text{NH}_2)_4\text{-LiH}$  (1:4, s8) heated to 340  $^{\circ}\text{C}$  (1  $^{\circ}\text{C}/\text{min}$ ). The temperature is represented by the dashed line.

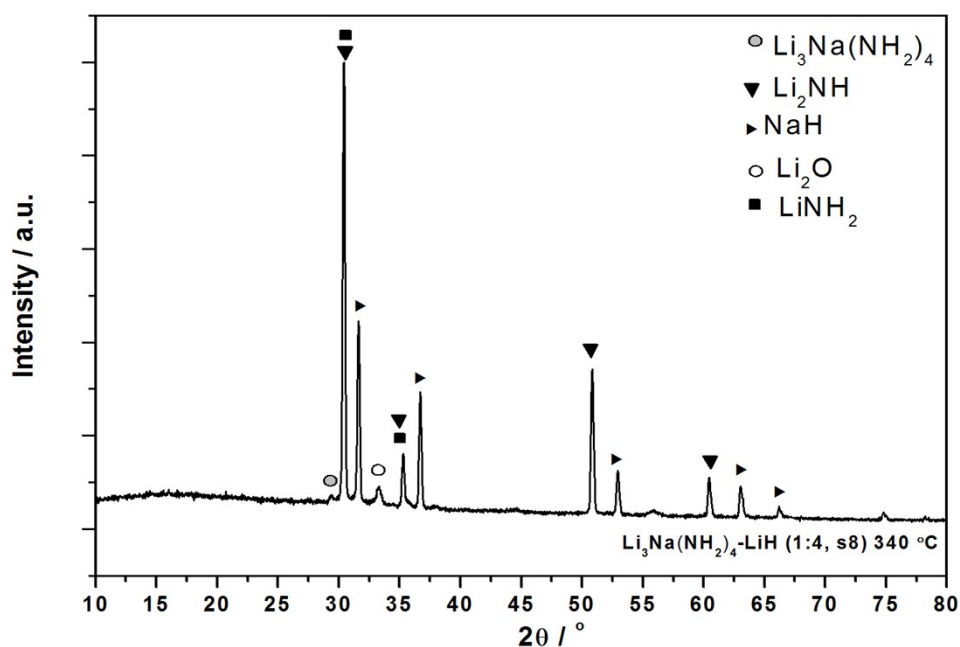

**Figure S9** PXD data for  $\text{Li}_3\text{Na}(\text{NH}_2)_4\text{-LiH}$  (1:4, s8) after heating to 340 °C,  $\lambda = 1.54056 \text{ \AA}$ . Symbols:  $\blacksquare$   $\text{LiNH}_2$ ;  $\blacktriangle$   $\text{NaH}$ ;  $\circ$   $\text{Li}_3\text{Na}(\text{NH}_2)_4$ ;  $\blacktriangle$   $\text{Li}_2\text{NH}$ ;  $\circ$   $\text{Li}_2\text{O}$ .

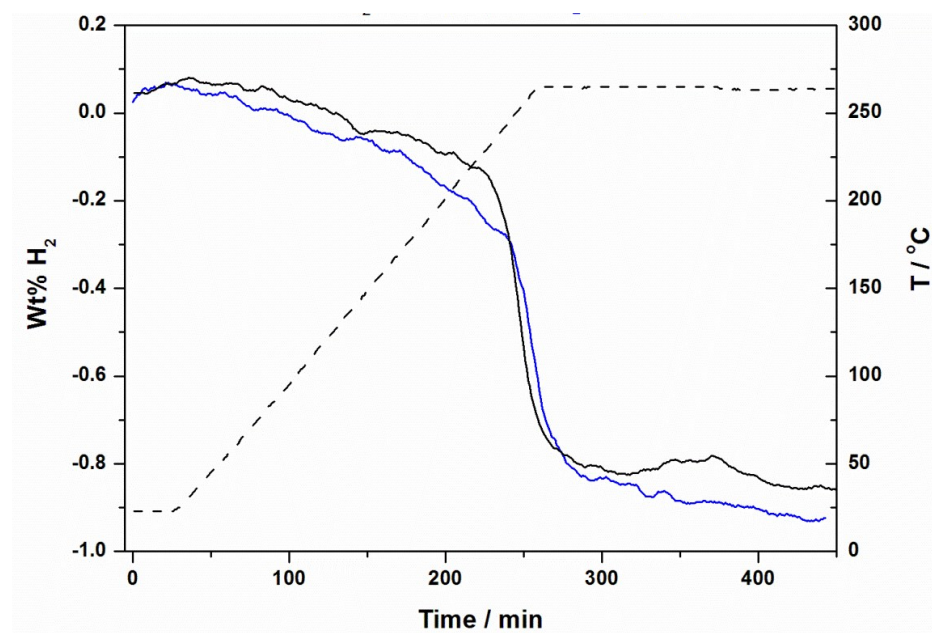

**Figure S10** Sieverts measurements of  $\text{LiNH}_2\text{-NaH}$  (1:1, s10, black line) and  $\text{NaNH}_2\text{-LiH}$  (1:1, s11, blue line) heated to 340 °C (1 °C/min). The temperature is represented by the dashed line.



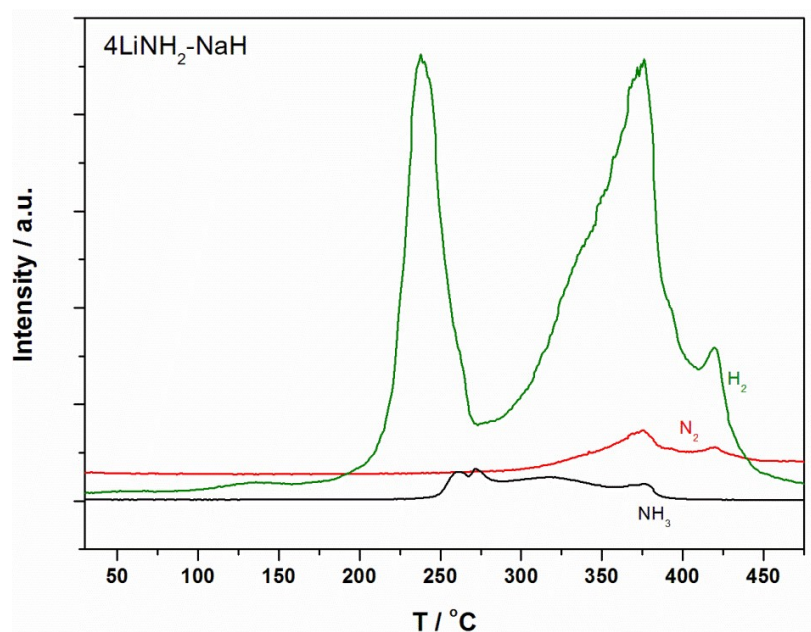

**Figure S11** TPD-MS for  $\text{LiNH}_2\text{--NaH}$  (4:1) during heating from RT to 475 °C (2 °C/min).

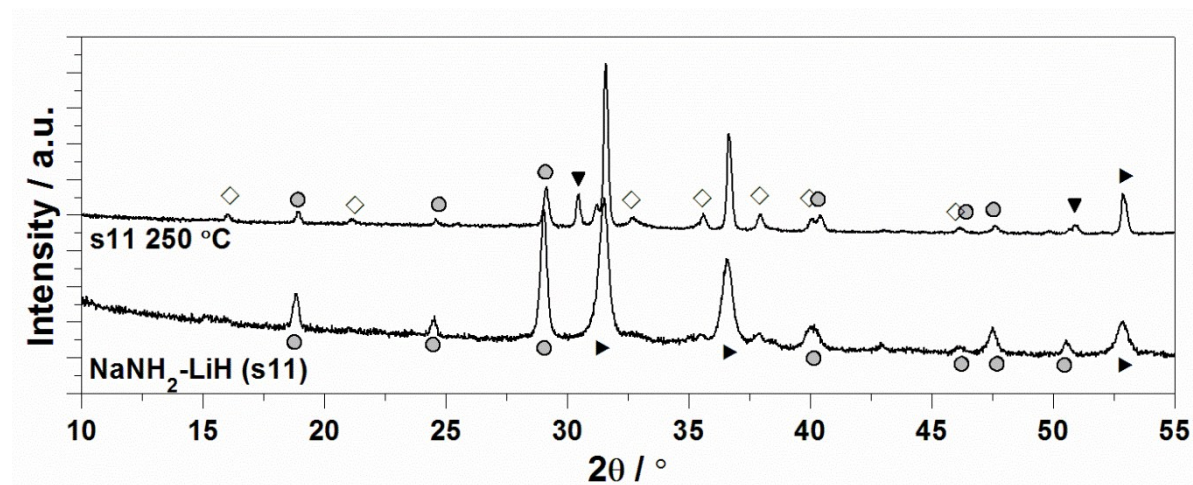

**Figure S12** PXD data for  $\text{NaNH}_2\text{--LiH}$  (s11) and after heating s11 to 270 °C. Both PXD patterns were measured at RT,  $\lambda = 1.54056 \text{ \AA}$ . Symbols: ■  $\text{LiNH}_2$ ; ▲  $\text{NaH}$ ; ●  $\text{Li}_3\text{Na}(\text{NH}_2)_4$ ; ◇  $\text{LiNa}_2(\text{NH}_2)_3$ ; ▲  $\text{Li}_2\text{NH}$ .

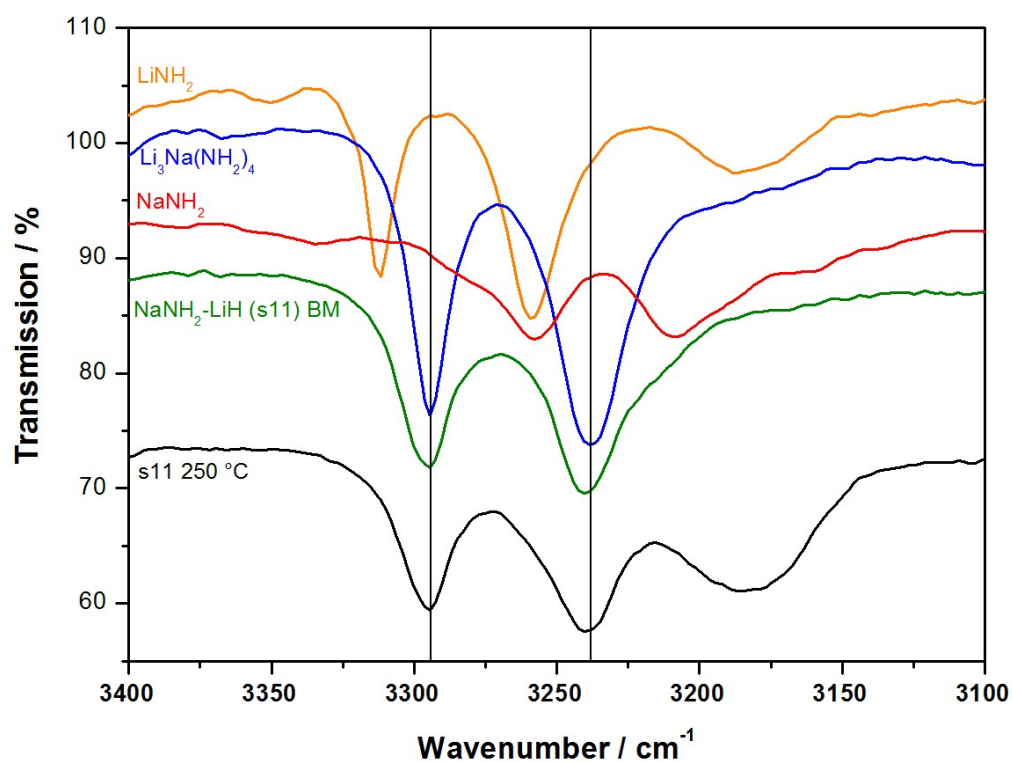

**Figure S13** FTIR spectra for NaNH<sub>2</sub>-LiH (s11) and after heating s11 to 270 °C. All spectra were collected at RT.



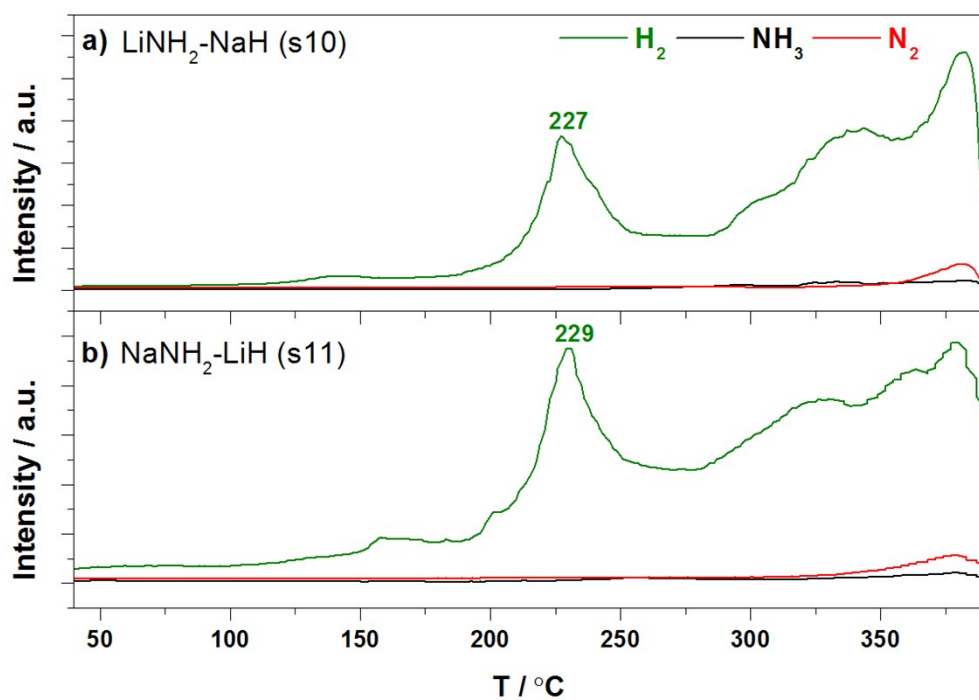

**Figure S14** TPD-MS for a) LiNH<sub>2</sub>-NaH (s10) and b) NaNH<sub>2</sub>-LiH (s11) during heating from RT to 400 °C (2 °C/min).
